# Supplementary material
Source: publisher site journal article supplement (https://www.dovepress.com/get_supplementary_file.php?f=474150.docx)
Supplement: Supplementary file 1 [file get_supplementary_file.php]

**Supplementary Figure Legend**

**Figure S1** Localization of dual-carbapenamse through S1-PFGE and Southern blot analysis. A was the localization of *bla*KPC gene with S1-PFGE and *bla*KPC probe. B was the localization of *bla*NDM gene with S1-PFGE and *bla*NDM probe. C was the localization of *bla*IMP gene with S1-PFGE and *bla*IMP probe. The numerical codes represent strain numbers, as detailed below:

1, strain FYH-SY carrying the carbapenem resistant genes *bla*KPC-2 and *bla*IMP-4;

2, strain Kpn-98 carrying the carbapenem resistant genes *bla*KPC-2 and *bla*IMP-26;

3, strain XL-200731214 carrying the carbapenem resistant genes *bla*KPC-2 and *bla*NDM-5;

4, strain XL-20059286 carrying the carbapenem resistant genes *bla*KPC-2 and *bla*NDM-5;

5, strain FSQ carrying with carbapenem resistant genes *bla*KPC-2 and *bla*NDM-5;

6, strain 20040580 carrying with carbapenem resistant genes *bla*KPC-2 and *bla*NDM-5;

7, strain Kpn-96 carrying the carbapenem resistant genes *bla*KPC-2 and *bla*IMP-26;

8, strain LAS-AR4324 carrying the duplicated carbapenem resistant genes *bla*KPC-2;

9, strain Kpn-103 carrying the carbapenem resistant genes *bla*KPC-2 and *bla*IMP-26;

10, strain 21030615019 carrying with carbapenem resistant genes *bla*KPC-2 and *bla*NDM-1;

11, strain 21030415031 carrying with carbapenem resistant genes *bla*KPC-2 and *bla*NDM-1;

12, strain ZHH carrying the carbapenem resistant genes *bla*NDM-1 and *bla*IMP-4


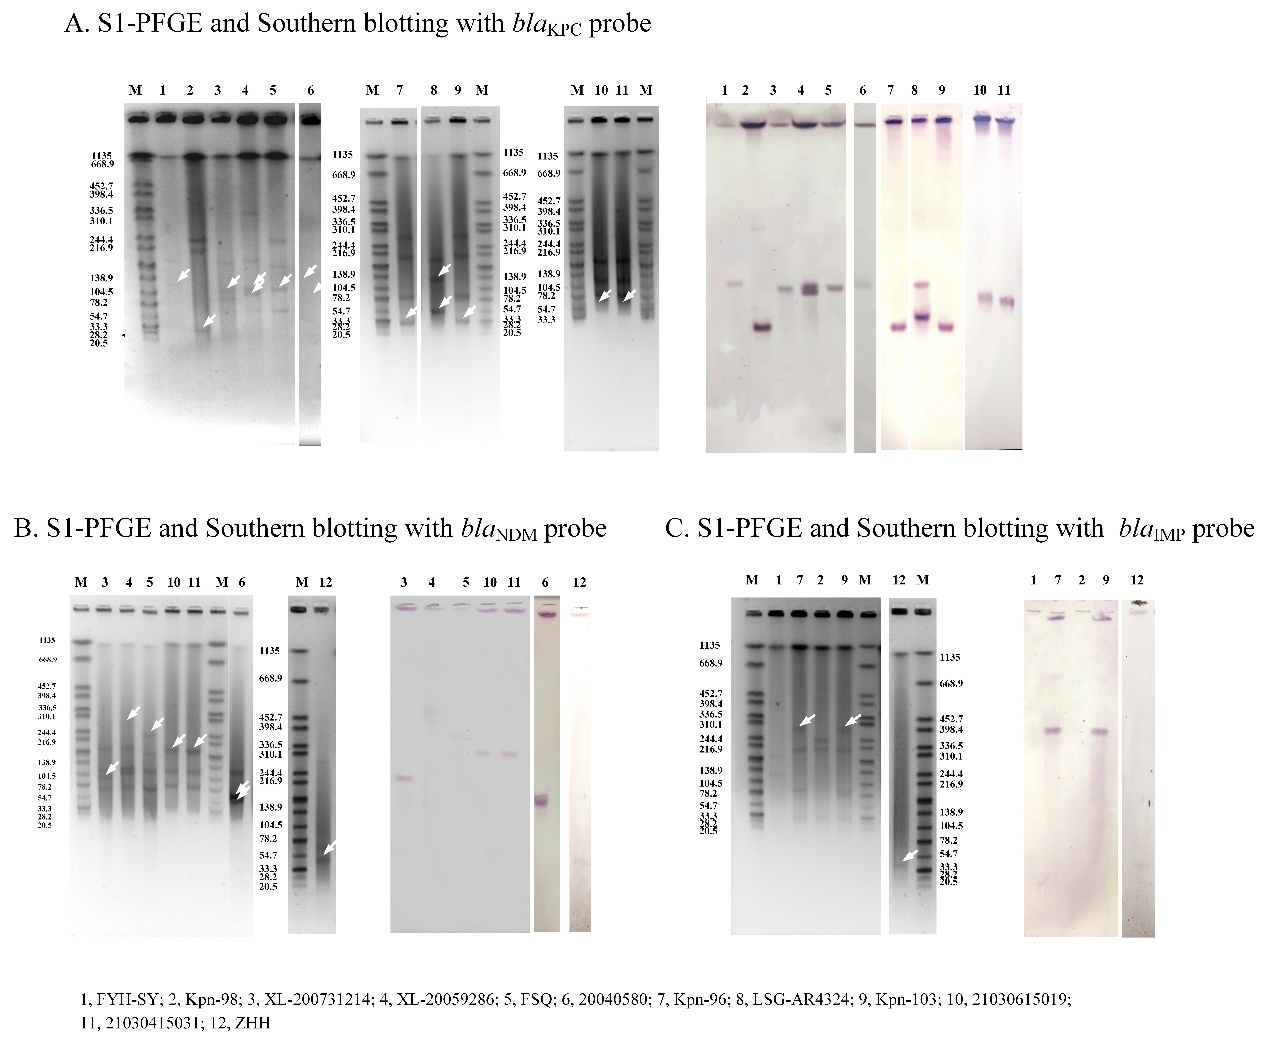


**Figure S1** Localization of dual-carbapenamse through S1-PFGE and Southern blot analysis.
